# Supplementary material for: Time-Resolved Scanning Ion Conductance Microscopy for Three-Dimensional Tracking of Nanoscale Cell Surface Dynamics
Source: PubMed Central journal article supplement — ACS Nano. 2021 Nov 9;15(11):17613–22. doi: 10.1021/acsnano.1c05202 (PMC8613909; doi:10.1021/acsnano.1c05202), 2021-11-09
Supplement: nn1c05202_si_003.pdf [file nn1c05202_si_003.pdf]

## Supporting Information

### **Time-Resolved Scanning Ion Conductance Microscopy for Three-Dimensional Tracking of Nanoscale Cell Surface Dynamics**

Samuel M. Leitao<sup>1</sup>, Barney Drake<sup>1</sup>, Katarina Pinjusic<sup>2</sup>, Xavier Pierrat<sup>3</sup>, Vytautas Navikas<sup>4</sup>, Adrian P. Nievergelt<sup>1</sup>, Charlène Brillard<sup>1</sup>, Denis Djekic<sup>5</sup>, Aleksandra Radenovic<sup>4</sup>, Alexandre Persat<sup>3</sup>, Daniel B. Constam<sup>2</sup>, Jens Anders<sup>5</sup> and Georg E. Fantner<sup>1\*</sup>

<sup>1</sup>Laboratory for Bio- and Nano-Instrumentation, Institute of Bioengineering, School of Engineering, Swiss Federal Institute of Technology Lausanne (EPFL); Lausanne 1015, Switzerland.

<sup>2</sup>Laboratory of Developmental and Cancer Cell Biology, Institute for Experimental Cancer Research, School of Life Sciences, Swiss Federal Institute of Technology Lausanne (EPFL); Lausanne 1015, Switzerland.

<sup>3</sup>Laboratory of Microbial Mechanics, Institute of Bioengineering and Global Health, School of Life Sciences, Swiss Federal Institute of Technology Lausanne (EPFL); Lausanne 1015, Switzerland.

<sup>4</sup>Laboratory of Nanoscale Biology, Institute of Bioengineering, School of Engineering, Swiss Federal Institute of Technology Lausanne (EPFL); Lausanne 1015, Switzerland.

<sup>5</sup>Institute of Smart Sensors, Universität Stuttgart; Stuttgart 70049, Germany.

\*e-mail: [georg.fantner@epfl.ch](mailto:georg.fantner@epfl.ch)

## Supplementary Figures, Notes and Movies.

**Figure S1.** Long-range actuator with preserved high bandwidth for wide axial scanning range on the cell surface.

**Figure S2.** Working principle of the time-resolved SICM controller.

**Figure S3.** Schematics of the time-resolved SICM setup implementation.

**Figure S4.** Schematic of the implemented multi-element pseudo-resistor (MEPR).

**Figure S5.** Custom monolithic bandwidth-extended transimpedance amplifier (BE-TIA) for high-speed current-to-voltage conversion in SICM.

**Figure S6.** Time-resolved SICM system composed of a high-performance SICM actuator integrated into an environmental chamber with temperature and CO<sub>2</sub> control.

**Figure S7.** Time-resolved SICM reveals dynamic protrusions on the apical cell surface.

**Figure S8.** Time-resolved SICM reveals two cells fusing in syncytium.

**Figure S9.** Time-resolved SICM reveals the appearance and disappearance of circular dorsal ruffles (CDR1).

**Figure S10.** Time-resolved SICM reveals the appearance and disappearance of two circular dorsal ruffles CDR2, CDR3.

**Figure S11.** High dynamic range of XYZ-actuation with SICM high-speed performance.

**Figure S12.** High dynamic range of XYZ-actuation with SICM high-speed performance and long time-lapse SICM capabilities.

**Figure S13.** Increased temporal resolution on detected events of interest.

**Figure S14.** Effect of Forskolin (FSK) on melanoma cells.

**Figure S15.** Time-resolved SICM imaging sequence showing melanoma dendrites outgrowth over time after the treatment with 20  $\mu$ M FSK..

**Figure S16.** Topography profiles of dendrites outgrowth on a melanoma cell after the indicated duration of FSK treatment.

**Figure S17.** Real-time effect of FSK on a melanoma cell membrane with fast SICM image acquisition.

**Figure S18.** Tracking morphological changes on melanoma cell treated with FSK with time-resolved SICM.

**Figure S19.** Fluorescence image of the bacterium affinity (*E. coli*) to the host mammalian cell membrane (HeLa), correlated with SICM topography.

**Figure S20.** Time-resolved SICM shows a HeLa cell being infected by *E. coli* bacteria.

**Figure S21.** Time-resolved SICM shows *E. coli* being internalized by HeLa cell membrane over time.

**Figure S22.** Fluorescence image of *E. coli* internalized by HeLa cell membrane.

**Figure S23.** Correlative fluorescence and scanning ion conductance microscopy.

**Supplementary Note 1.** Time-resolved SICM controller implementation.

**Supplementary Note 2.** Multi-element pseudo-resistor (MEPR) implementation.

**Movie S1.** Time-resolved SICM imaging over 28 hours time-lapse scanning of live kidney cells in optimal culture conditions. 80  $\mu\text{m}$  area.

**Movie S2.** Time-resolved SICM imaging over 24 hours time-lapse scanning of live kidney cells in optimal culture conditions. 20  $\mu\text{m}$  area.

**Movie S3.** Time-resolved SICM with high dynamic range of XYZ-actuation and high-speed performance capabilities on live kidney cells.

**Movie S4.** Time-resolved SICM imaging at 0.5 s/image time-lapse scanning of live kidney cells.

**Movie S5.** Time-resolved SICM tracking biologic processes on the cell membrane - endocytic pits, on human melanoma cells.

**Movie S6.** Time-resolved SICM imaging over 48 hours time-lapse scanning of melanoma cell differentiation during prolonged treatment with forskolin (FSK).

**Movie S7.** Time-resolved SICM tracking FSK-induced dendrite outgrowth in melanoma cells.

**Movie S8.** Time-resolved SICM tracking morphological of melanoma cell differentiation during prolonged treatment with forskolin (FSK).

**Movie S9.** Time-resolved SICM tracking bacteria infecting a host mammalian cell.

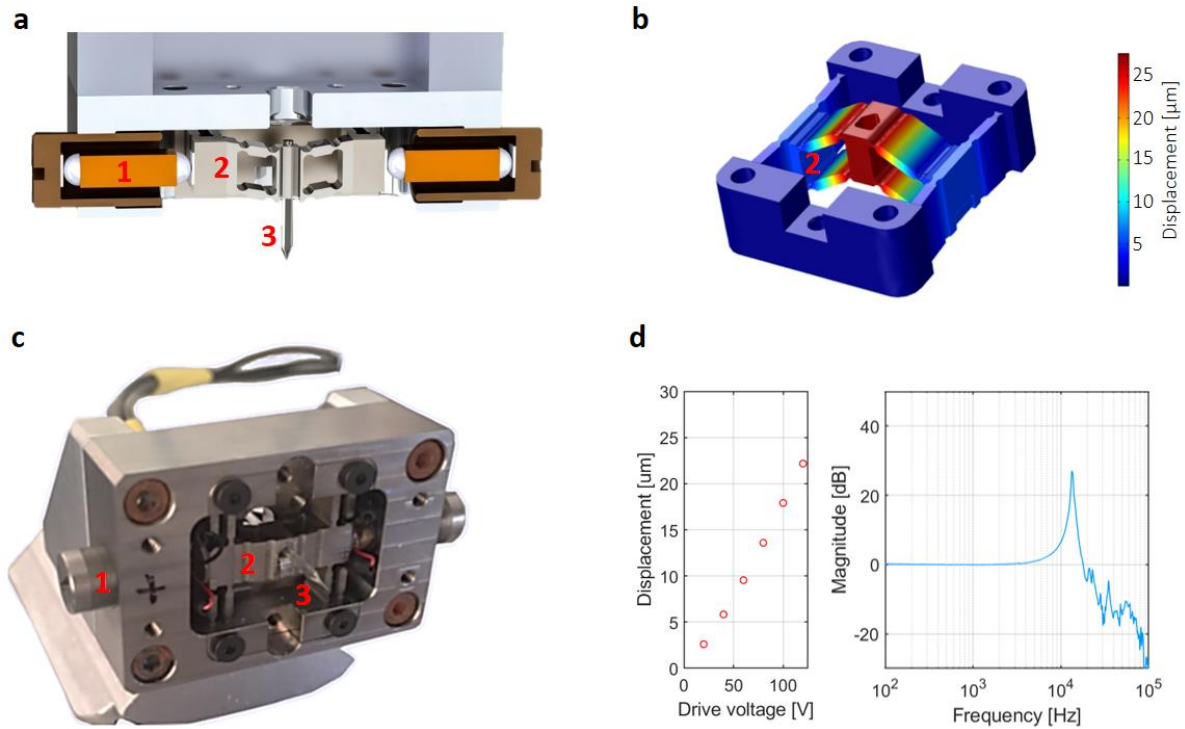

**Figure S1.** Long-range actuator with preserved high bandwidth for wide axial scanning range on the cell surface. (a) 3D rendering of a cross-section of the SICM pipette actuator. 1 shows the piezoelectric element, 2 shows the titanium flexure, and 3 the silicate nanopipette. (b) Finite element simulation of the motion of the actuator configuration allowing for a mechanical amplification with high-resonance. (c) Implementation of custom-built pipette actuator to perform cell topography imaging. (d) Mechanical displacement range of 22.17  $\mu\text{m}$  for 120 V drive voltage (on the left in red). (e) and the actuator frequency response curve with the first resonance at 13.5 kHz (on the right in blue).

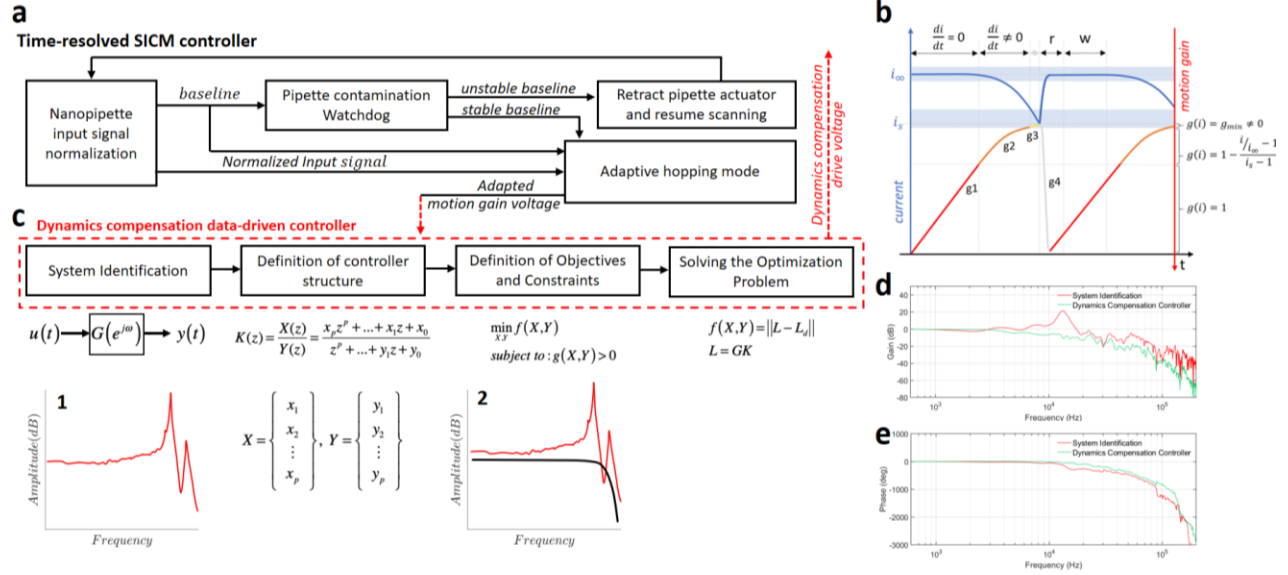

**Figure S2.** Working principle of the time-resolved SICM controller. (a) Wiring diagram of the controller highlighting the main features: Adaptive hopping mode, a data-driven controller, and a pipette contamination watchdog. (b) The principle of the adaptive hopping mode with an illustration showing the relationship between the current over time (blue) and piezo motion gain (red). The gain ( $g1$  and  $g2$ ) is proportional to the change in current ( $di/dt$ ), converging to a minimal gain ( $g3$ ) until set point is reached, triggering the piezo retraction ( $g4$ ). The baseline is calculated by recording and averaging data over a time window size ( $w$ ) after a time delay ( $r$ ). (c) The data-driven controller<sup>1</sup> is composed of four steps: System identification; Definition of controller structure; Definition of objectives and constraints; and Solving the optimization problem. (d) System identification of the SICM actuator (Red) and its response after the implementation of the data-driven controller (Green). (e) Phase plot showing the system's response before (Red) and after (Green) the data-driven controller implementation.

### Supplementary Note 1: Time-resolved SICM controller implementation.

The time-resolved SICM controller consists of three main features (Supplementary Figure 2a): Adaptive hopping mode, a data-driven controller, and a pipette contamination watchdog. The adaptive mode is characterized by an adaptive gain applied to the piezo motion in the function of the measured current slope. The model used in the adaptive gain is described as  $g(i) = 1 - \frac{i/i_\infty - 1}{i_s - 1}$ , where  $i$  is the measured current,  $i_\infty$  is the baseline current (current when the pipette is far from the

surface),  $i_s$  is the current set point, and  $g_{\min}$  is the minimum gain (Supplementary Figure 2b). The adaptive hopping mode is an adaptation of the closed-loop approach-retract-scanning (ARS) model.<sup>2</sup>

The data-driven controller design consists of four main steps (Supplementary Figure 2c). In the first step, a pseudo-random-binary-sequence signal is applied to the input ( $u(t)$ ) of the piezo-actuator and the motion is recorded ( $y(t)$ ). The acquired input-output data is used to construct a non-parametric frequency response ( $G(e^{j\omega})$ ) of the piezo-actuator which represents its dynamics (c1). Afterward, a structure is defined for the controller based on the available resources. Here, a parametric 16th-order discrete-time filter is chosen,  $K(z) = \frac{X(z)}{Y(z)} = \frac{x_p z^p + \dots x_1 z + x_0}{z^p + \dots y_1 z + y_0}$ ; where  $X$  and  $Y$  are the parameters that shape the controller dynamics. In order to optimally select these parameters, a set of objectives ( $f(X, Y)$ ) and constraints ( $g(X, Y)$ ) are defined such that the combined behavior of the system (controller and actuator) satisfies our performance expectations. These optimization specifications determine the bandwidth of the system while guaranteeing its stability. For this configuration, the open-loop of the dynamics ( $L = GK$ ) is shaped based on a desired dynamic response ( $L_d$ ). In this regard, the area between the two frequency responses ( $\|L - L_d\|_2$ ) is minimized (c2). A convex optimization method is utilized to design the controller such that it attenuates the high-amplitude dynamics of the piezo-actuator (Supplementary Figure 2 d,e). This whole design process is executed once and the selected controller parameters are used through the rest of the process to prepare the drive signal of the SICM actuator.

In addition, nanopipette pore contamination is a frequent event in long-term SICM measurements that lead to a decrease in the image quality and often breaks the glass pipette. Therefore, in order to perform long-term imaging a current signal monitoring controller (Pipette contamination watchdog in Supplementary Figure 2a) triggers upon pipette contamination is detected and retracts the pipette from the medium. Capillaries forces successfully remove the contamination and the scanning is resumed, ensuring a long-lasting imaging performance.



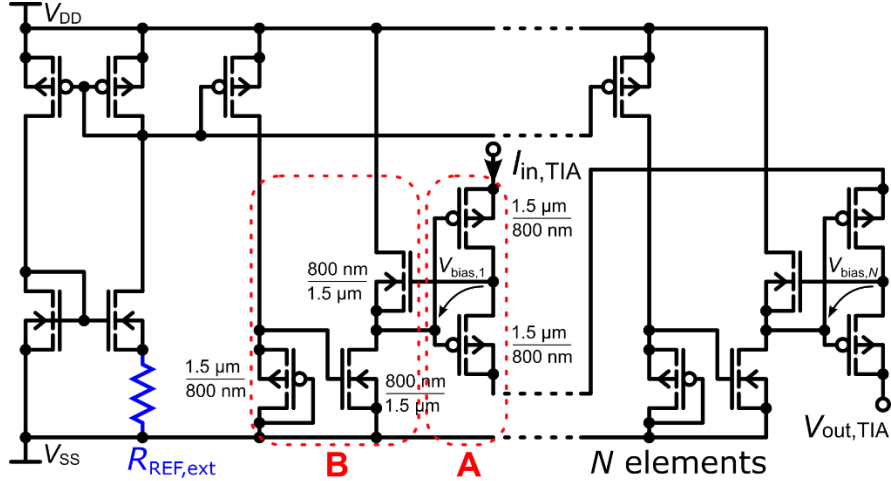

**Figure S4.** Schematic of the implemented multi-element pseudo-resistor (MEPR).  $I_{in}$  is the TIA current input,  $V_{out}$  is the TIA voltage output, and  $R_{REF,ext}$  is the external reference resistor, which sets the MEPR's large resistance value. A, p-channel MOS transistor pairs. B, Biasing circuit based on a pseudo current mirror.

### Supplementary Note 2: Multi-element pseudo-resistor (MEPR) implementation.

The feedback resistor used in the TIA consists of p-channel MOS transistor pairs, which are biased in weak inversion and operated in the linear regime (A). Such devices are also named pseudo-resistors due to their resistive behavior for drain-source voltages  $V_{DS}$  below the thermodynamic voltage  $U_T = kT/q$ , of which  $k$  is the Boltzmann constant,  $T$  the absolute temperature, and  $q$  the elementary charge. To linearize the  $I/V$  characteristic, a large number of  $N$  pseudo-resistor elements are connected in series so that  $V_{DS}$  does not exceed  $U_T$  even for the TIA's maximum output voltage. Since the pseudo-resistors in A are operated in weak inversion, they exhibit exponential dependencies on absolute temperature and threshold voltage. A specific biasing circuit (B) renders the exponential dependencies on absolute parameters to exponential dependencies on the mismatch between those parameters of the pseudo-resistors and the biasing circuit's transistors.<sup>4</sup> A large number of elements further averages the transistor's mismatch and, hence, the resistance value is precise and robust against variations of temperature and process parameters.<sup>5</sup> Furthermore, the biasing circuit facilitates the pseudo-resistors to be floating due to its current source, which provides the floating biasing voltage  $V_{bias}$  via the source follower. The entire device of Supplementary Figure 4 is referred to as multi-element pseudo-resistor (MEPR)<sup>6</sup>. The MEPR's



resistor value can be tuned using an external reference resistor  $R_{REF}$ . A large tuning range from  $1\text{M}\Omega$  to  $1\text{G}\Omega$  has been reported<sup>4</sup>. Moreover, it has been shown that the MEPR features a noise floor similar to the Johnson noise of an equivalent ideal ohmic resistor.<sup>6</sup> To minimize the noise, we have implemented the TIA with its maximum gain of  $1\text{G}\Omega$ .

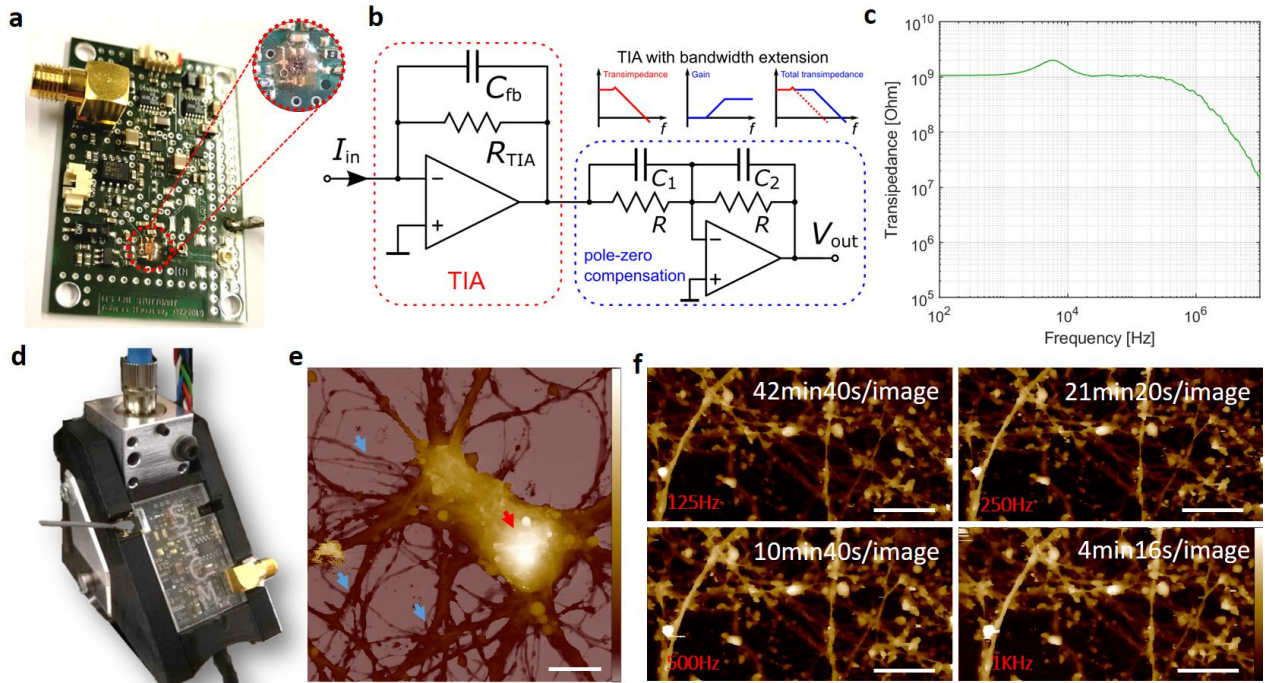

**Figure S5.** Custom monolithic bandwidth-extended transimpedance amplifier (BE-TIA) for high-speed current-to-voltage conversion in SICM. (a) Printed circuit board and a zoom-in of the BE-TIA. (b) Schematic of the TIA (red) and the succeeding pole-zero compensation circuit for bandwidth extension (blue). (c) Measured transimpedance vs frequency of the BE-TIA. (d) Integration of the BE-TIA circuit in the SICM setup. (e) To demonstrate the performance of the system, we acquired a  $60\ \mu\text{m}$  area image of a single mouse cortical neuron, fixed in 4% PFA in PBS solution. The red arrow shows the cell body and the blue arrows show the intricate network of neurites. Scale bar,  $10\ \mu\text{m}$ . Z scale,  $0\text{--}8\ \mu\text{m}$ . (f) To demonstrate the improvement in frame rate acquisition ( $512 \times 256$  pixels) with the integrated BE-TIA circuit, we performed SICM imaging of fixed cortical neurons. This panel shows no loss in the image quality of the neurites for higher hopping rates. Images were acquired at 125 Hz, 250 Hz, 500 Hz, and 1 kHz hopping rate ( $500\ \text{nm}$  hopping height). Scale bar,  $10\ \mu\text{m}$ . Z scale,  $0\text{--}2\ \mu\text{m}$ .

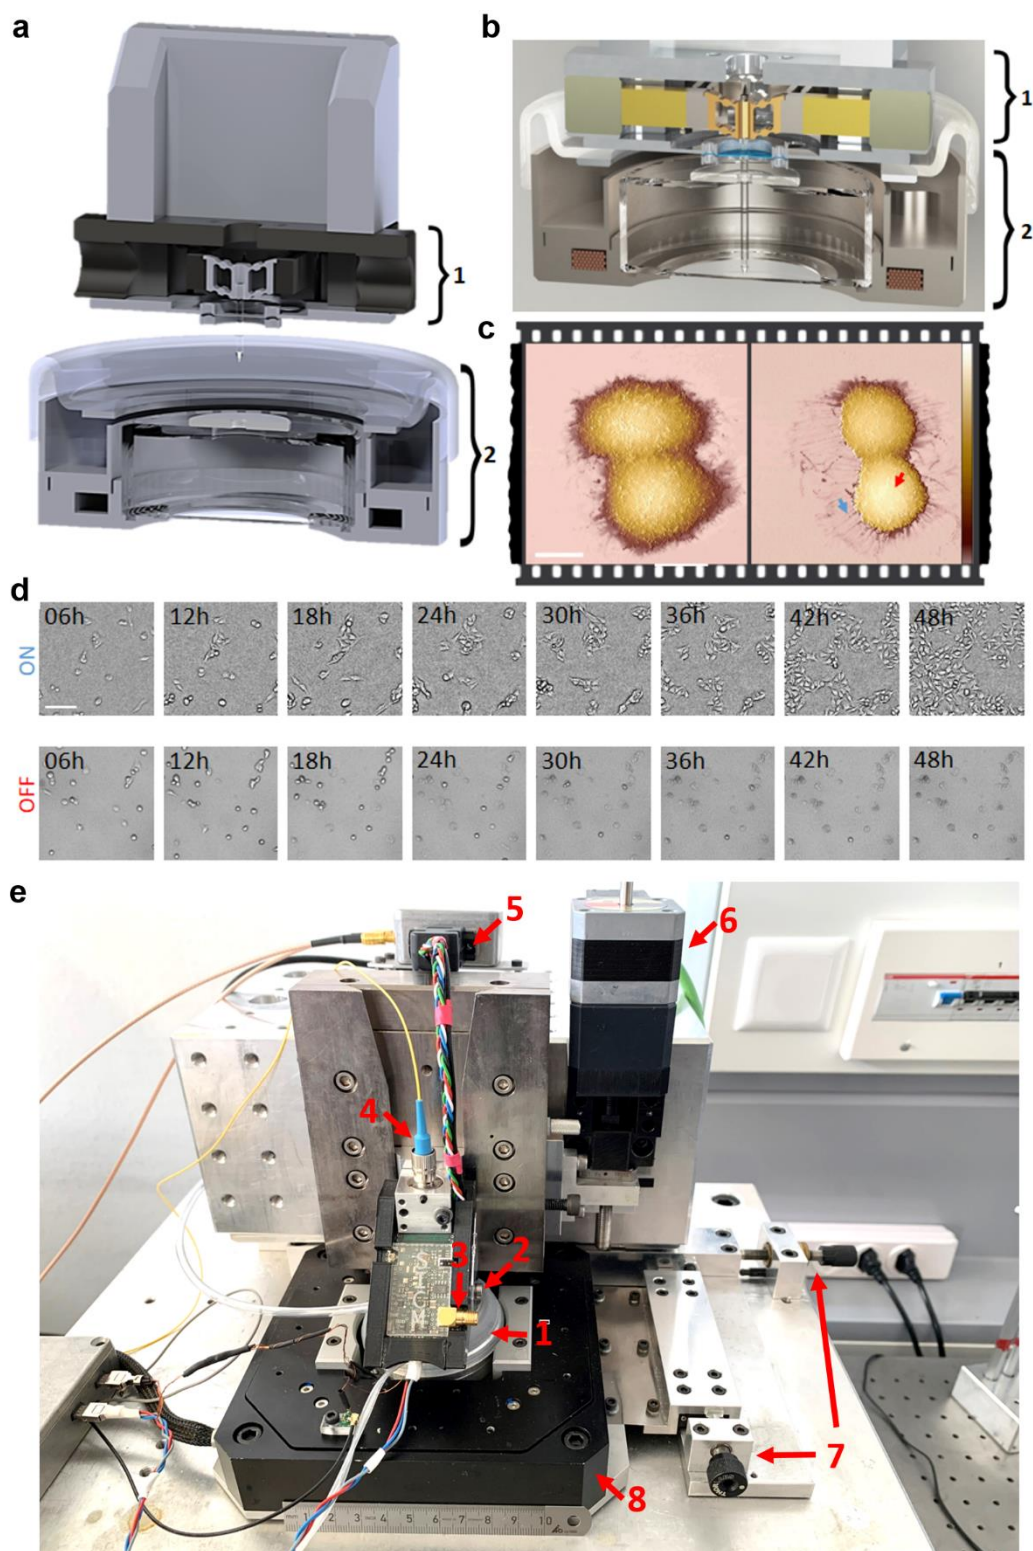

**Figure S6.** Time-resolved SICM system composed of a high-performance SICM actuator integrated into an environmental chamber with temperature and CO<sub>2</sub> control. (a) 3D rendering of a cross-section of the SICM actuator (1) apart from the miniature incubator (2). (b) 3D rendering

of a cross-section of the enclosed SICM system (1 and 2 together). (c) Without the appropriate culture environment during the scanning, cells tend to undergo apoptosis within a few hours. This SICM topography image shows HeLa cells detaching from the surface after 6 hours without temperature and CO<sub>2</sub> diffusion in cell medium. The red arrow shows the cell body rounding and the blue arrow points to retracted adhesions where the cells were previously attached. Scale bar, 20 μm. Z scale, 0–12 μm. (d) Upper row: Brightfield microscopy of cell growth under conditions of a controlled atmosphere, demonstrating cell viability and proliferation over 48 hours. Bottom row: Cell growth without environmental control. Scale bar, 50 μm. (e) Time-resolved SICM setup with an environmental control chamber for live cell imaging: 1) Mini-incubator for environmental control; 2) High-performance Z scanner; 3) BE-TIA output; 4) Optical fiber (interferometer); 5) Z scanner drive-voltage; 6) Stepper motor for axial positioning; 7) XY translation stage; 8) XY scanner.

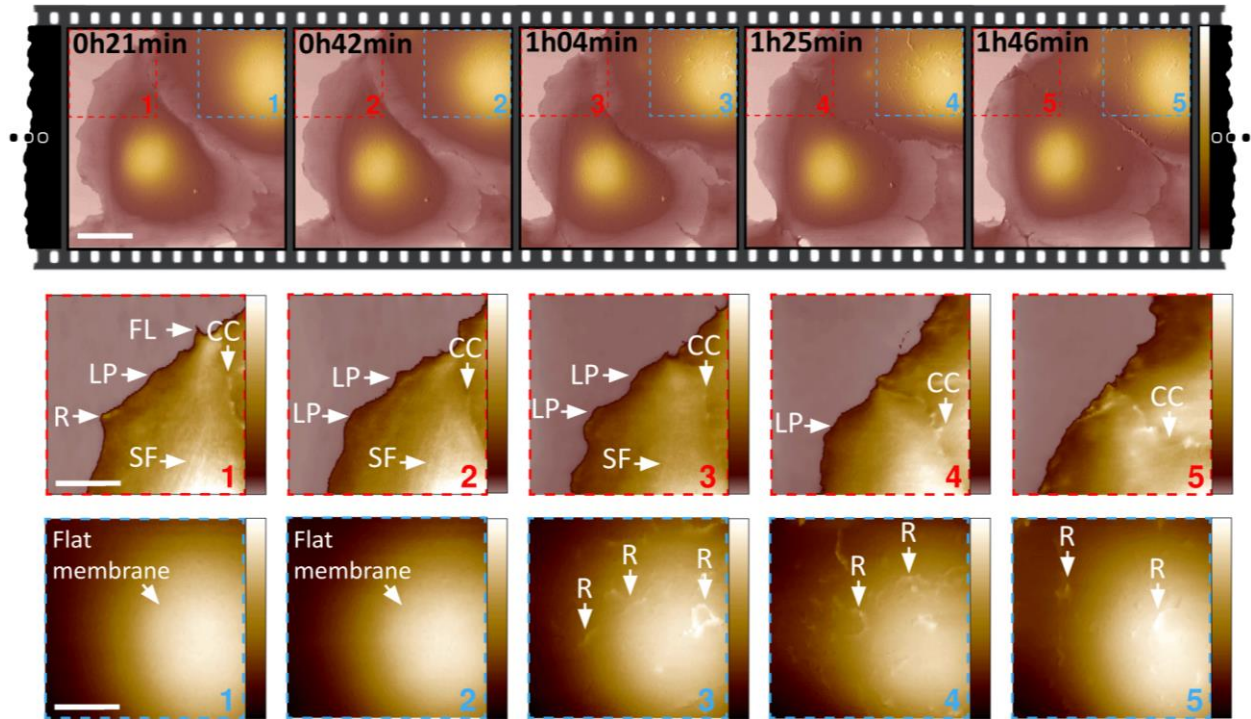

**Figure S7.** Time-resolved SICM reveals dynamic protrusions on the apical cell surface. Scale bar, 20  $\mu\text{m}$ . Z scale, 0–8.5  $\mu\text{m}$ . The sequence of zoom-in in red (1-5) shows motility on the cell periphery, with arrows identifying ruffles (R), lamellipodia (LP), filopodia (FL), cell-cell contact (CC), and stress fibers (SF). Scale bar, 10  $\mu\text{m}$ . Z scale, 0–1.2  $\mu\text{m}$ . The sequence of zoom-in in blue (1-5) shows the sudden appearance of dynamic ruffles (R) on the top of the cell membrane. Scale bar, 10  $\mu\text{m}$ . Z scale, 0–5.2  $\mu\text{m}$ .

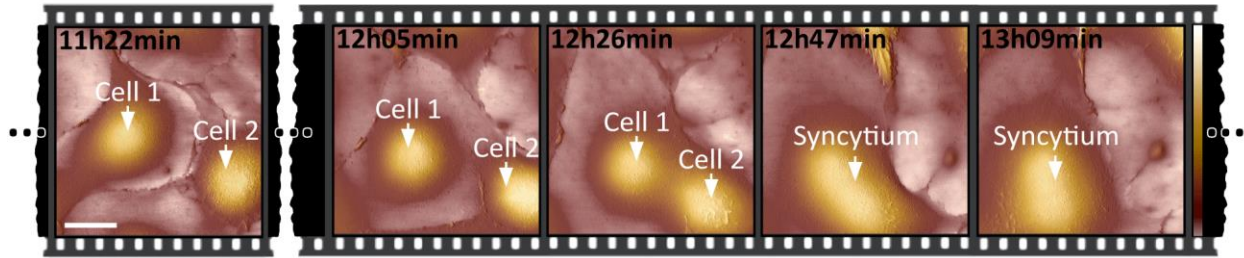

**Figure S8.** Time-resolved SICM reveals two cells fusing in syncytium. Arrows point to the top of two cells moving towards each other, fusing in syncytium. Scale bar, 20  $\mu\text{m}$ . z scale, 0–7  $\mu\text{m}$ .

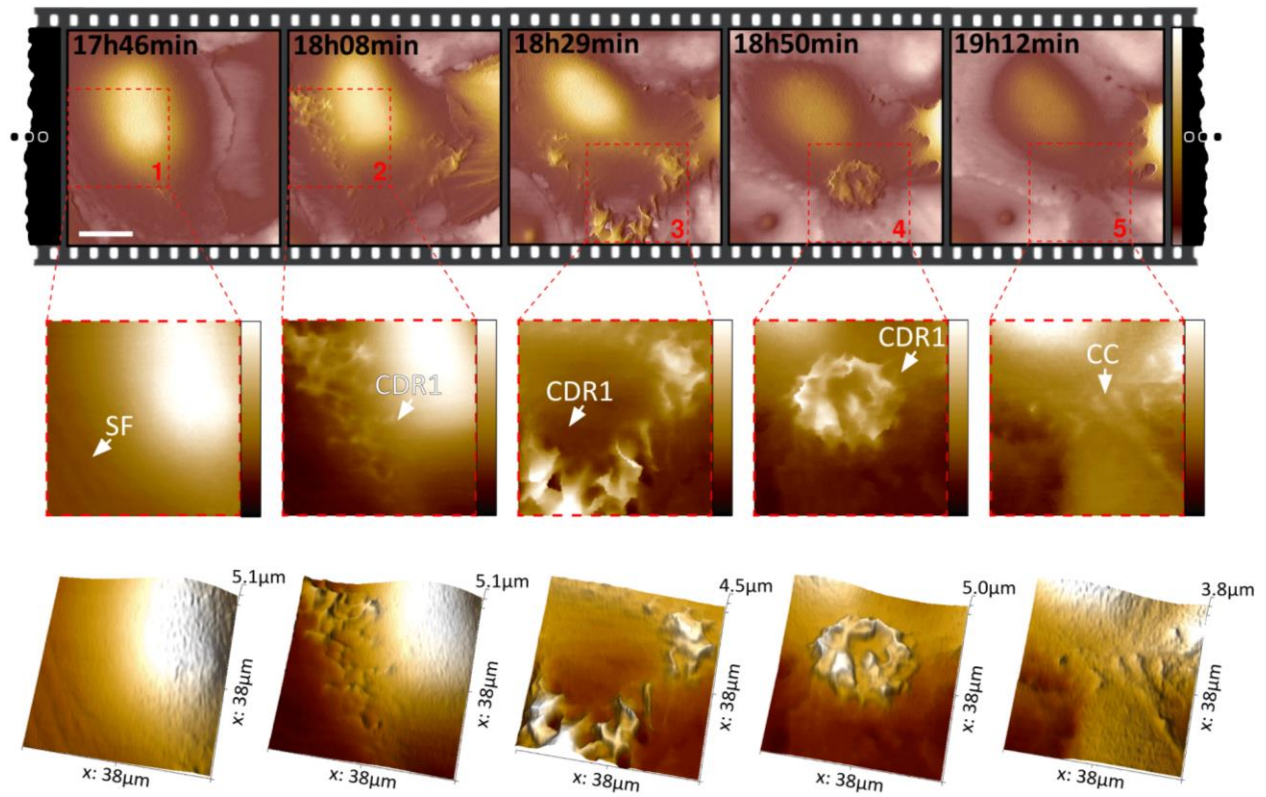

**Figure S9.** Time-resolved SICM reveals the appearance and disappearance of circular dorsal ruffles (CDR1). Scale bar, 20  $\mu\text{m}$ . Z scale, 0–7  $\mu\text{m}$ . The sequence of zoom-in in red (1-5) shows the sudden formation of a CDR. Z scale, 0–5  $\mu\text{m}$ , 0–5  $\mu\text{m}$ , 0–4  $\mu\text{m}$ , 0–5  $\mu\text{m}$ , 0–3  $\mu\text{m}$ . Three-dimensional view of the sequence on the bottom.

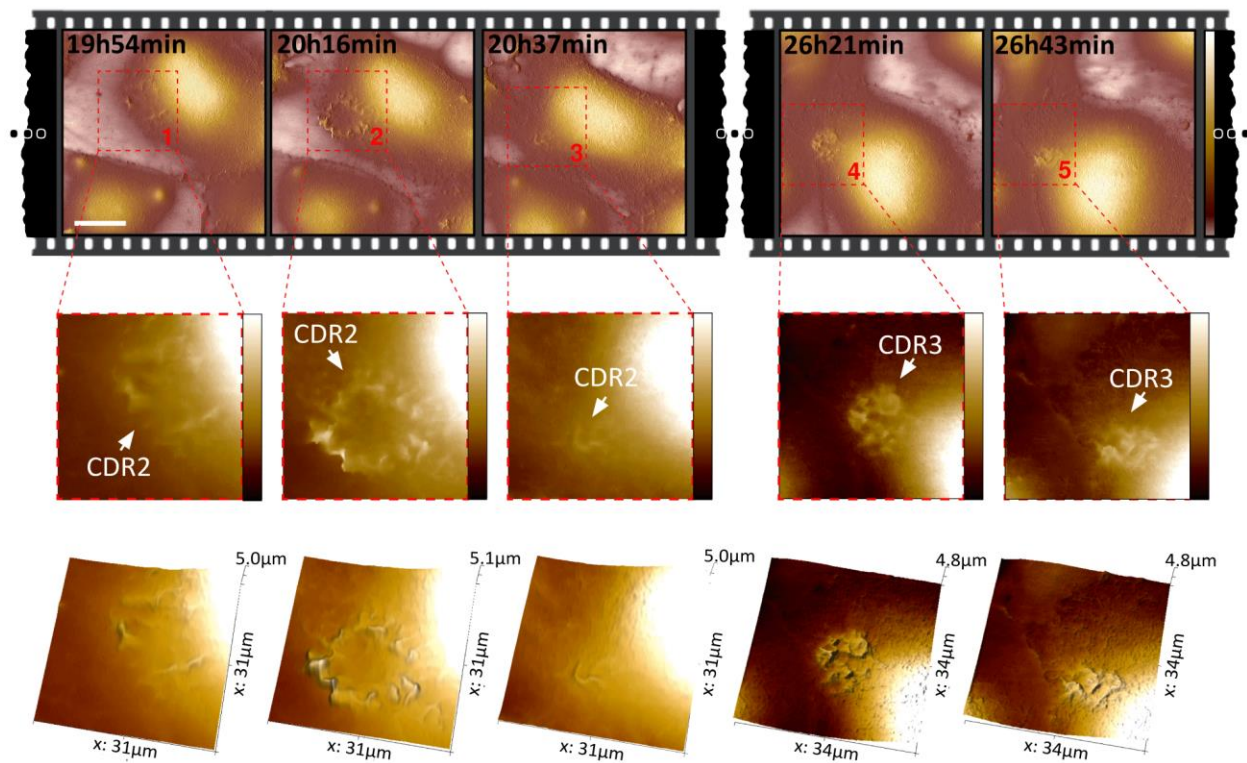

**Figure S10.** Time-resolved SICM reveals the appearance and disappearance of two circular dorsal ruffles CDR2, CDR3. Scale bar, 20  $\mu\text{m}$ . Z scale, 0–7  $\mu\text{m}$ . The sequence of zoom-in in red shows the sudden formation of two CDRs, CDR2 (1-3) and CDR3 (4-5). Z scale, -1–4  $\mu\text{m}$  and 0–4  $\mu\text{m}$  for 1-3 and 4-5 respectively. Three-dimensional view of the sequence on the bottom.

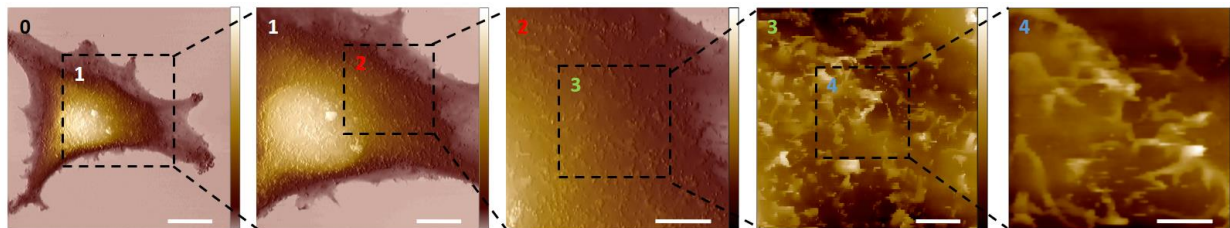

**Figure S11.** High dynamic range of XYZ-actuation with SICM high-speed performance. The first image shows the topography of an entire melanoma cell body on an area of 100  $\mu\text{m}$  width. Acquired at 125 Hz hopping rate and 5  $\mu\text{m}$  hopping height,  $512 \times 256$  pixels. Z scale, 0-12  $\mu\text{m}$ . Scale bar, 20  $\mu\text{m}$ . 1: Topography image on a smaller area of 50  $\mu\text{m}$  width. Acquired at 200 Hz hopping rate and 3  $\mu\text{m}$  hopping height,  $512 \times 256$  pixels. Scale bar, 10  $\mu\text{m}$ . Z scale, 0-12  $\mu\text{m}$ . 2: Topography image on a smaller area of 20  $\mu\text{m}$  width. Acquired at 285 Hz hopping rate and 2  $\mu\text{m}$  hopping height,  $256 \times 128$  pixels. Scale bar, 5  $\mu\text{m}$ . Z scale, 0-10  $\mu\text{m}$ . 3: Topography image on a smaller area of 10  $\mu\text{m}$  width. Acquired at 500 Hz hopping rate and 1  $\mu\text{m}$  hopping height,  $256 \times 128$  pixels. Scale bar, 2  $\mu\text{m}$ . Z scale, 0-1.5  $\mu\text{m}$ . 4: Topography image on a smaller area at 10 s/image. From a sequence of images acquired at 1 kHz hopping rate and 800 nm hopping height,  $100 \times 100$  pixels. Scale bar, 1  $\mu\text{m}$ . Z scale, 0-1.2  $\mu\text{m}$ . For better visualization, images 0-2 were merged with the slope, and 3-4 were leveled by a mean plane subtraction.



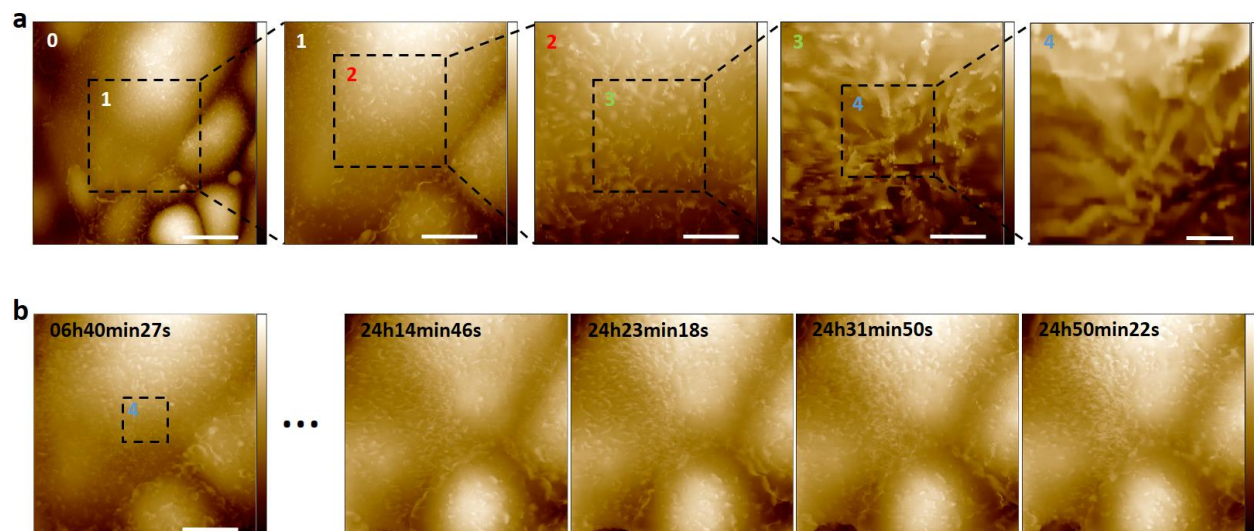

**Figure S12.** High dynamic range of XYZ-actuation with SICM high-speed performance and long time-lapse SICM capabilities. (a) The first image shows the topography of kidney cells on an area of 80  $\mu\text{m}$  width. Acquired at 200 Hz hopping rate and 3  $\mu\text{m}$  hopping height,  $512 \times 256$  pixels. Scale bar, 20  $\mu\text{m}$ . Z scale, 0-7.5  $\mu\text{m}$ . 1: Topography image on a smaller area of 40  $\mu\text{m}$  width. Acquired at 250 Hz hopping rate and 2.5  $\mu\text{m}$  hopping height,  $512 \times 256$  pixels. Scale bar, 10  $\mu\text{m}$ . Z scale, 0-7  $\mu\text{m}$ . 2: Topography image on a smaller area of 20  $\mu\text{m}$  width. Acquired at 285 Hz hopping rate and 2  $\mu\text{m}$  hopping height,  $256 \times 128$  pixels. Scale bar, 5  $\mu\text{m}$ . Z scale, 0-4.5  $\mu\text{m}$ . 3: Topography image on a smaller area of 10  $\mu\text{m}$  width. Acquired at 500 Hz hopping rate and 1  $\mu\text{m}$  hopping height,  $256 \times 128$  pixels. Scale bar, 2.5  $\mu\text{m}$ . Z scale, 0-2.5  $\mu\text{m}$ . 4: Topography image on a smaller area. From a sequence of images acquired at 670 Hz hopping rate and 800 nm hopping height,  $128 \times 64$  pixels. Scale bar, 1  $\mu\text{m}$ . Z scale, 0-2  $\mu\text{m}$ . (b) Zoom-out scanning from a4 followed by a 24 hours time-lapse sequence. Acquired at 250 Hz hopping rate and 2.5  $\mu\text{m}$  hopping height,  $512 \times 256$  pixels. Scale bar, 10  $\mu\text{m}$ . Z scale, 0-7  $\mu\text{m}$  for the frame at 06h40min27s and 0-5.5  $\mu\text{m}$  for the 4 frames after 24 hours.

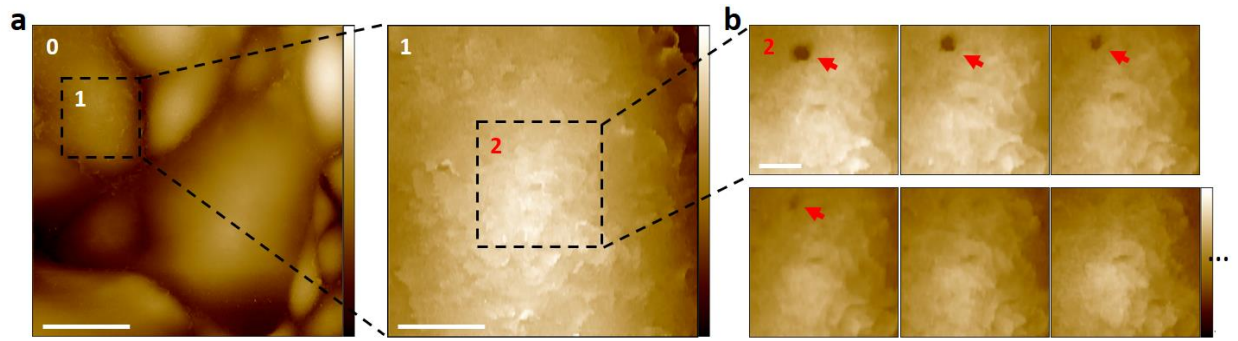

**Figure S13.** Increased temporal resolution on detected events of interest. (a) The first image shows the topography of kidney cells on a large area. Acquired at 125 Hz hopping rate and 5 μm hopping height, 512 × 256 pixels. Scale bar, 16 μm. Z scale, 0-10 μm. 1: Topography image on a smaller area, marked in 0. Acquired at 250 Hz hopping rate and 2 μm hopping height, 256 × 128 pixels. Scale bar, 4 μm. Z scale, 0-5 μm. (b) By decreasing the scanning area and focusing on detected events of interest (area marked in 1), we can increase the temporal resolution. Processes such as endocytosis can be visualized on kidney cells (Red arrow). Acquired at 285 Hz hopping rate and 2 μm hopping height, 128 × 64 pixels. Scale bar, 2 μm. Z scale, 0-3 μm.

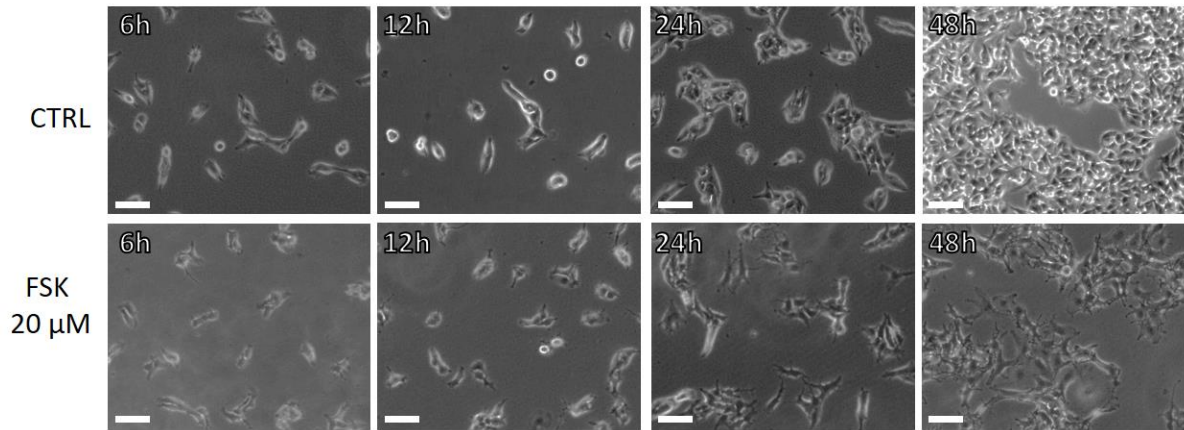

**Figure S14.** Effect of Forskolin (FSK) on melanoma cells. 50'000 cells were seeded on a glass-bottom petri-dish followed by an attachment period of 6 hours. Cells were then treated with 20  $\mu\text{M}$  FSK (bottom panel) and compared with the control (top panel). Image shows cells at 6, 12, 24, and 48 hours after cell seeding captured with a phase-contrast microscope. Scale bar, 200  $\mu\text{m}$ .

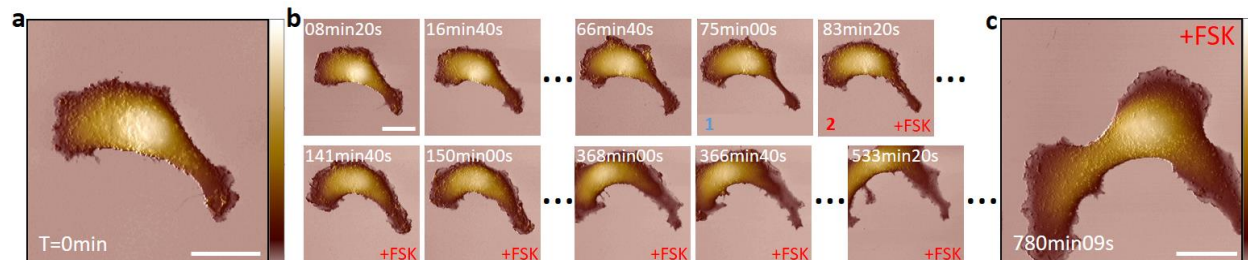

**Figure S15.** Time-resolved SICM imaging sequence showing melanoma dendrites outgrowth overtime after the treatment with 20  $\mu\text{M}$  FSK. (a) The first image of the sequence before FSK treatment. Scale bar, 10  $\mu\text{m}$ . Z scale, 0–9  $\mu\text{m}$ . (b) Several time points of the sequence over 780 minutes showing the effect FSK on a single dendrite (1) before and (2) after the treatment. (c) The last image of the sequence after 780 minutes highlighting morphological changes induced by FSK treatment, characterized by an increase in the width of the dendrite. Acquired at 125 Hz hopping rate and 6  $\mu\text{m}$  hopping height, 300  $\times$  200 pixels. Scale bar, 10  $\mu\text{m}$ . Z scale, 0–9  $\mu\text{m}$ .

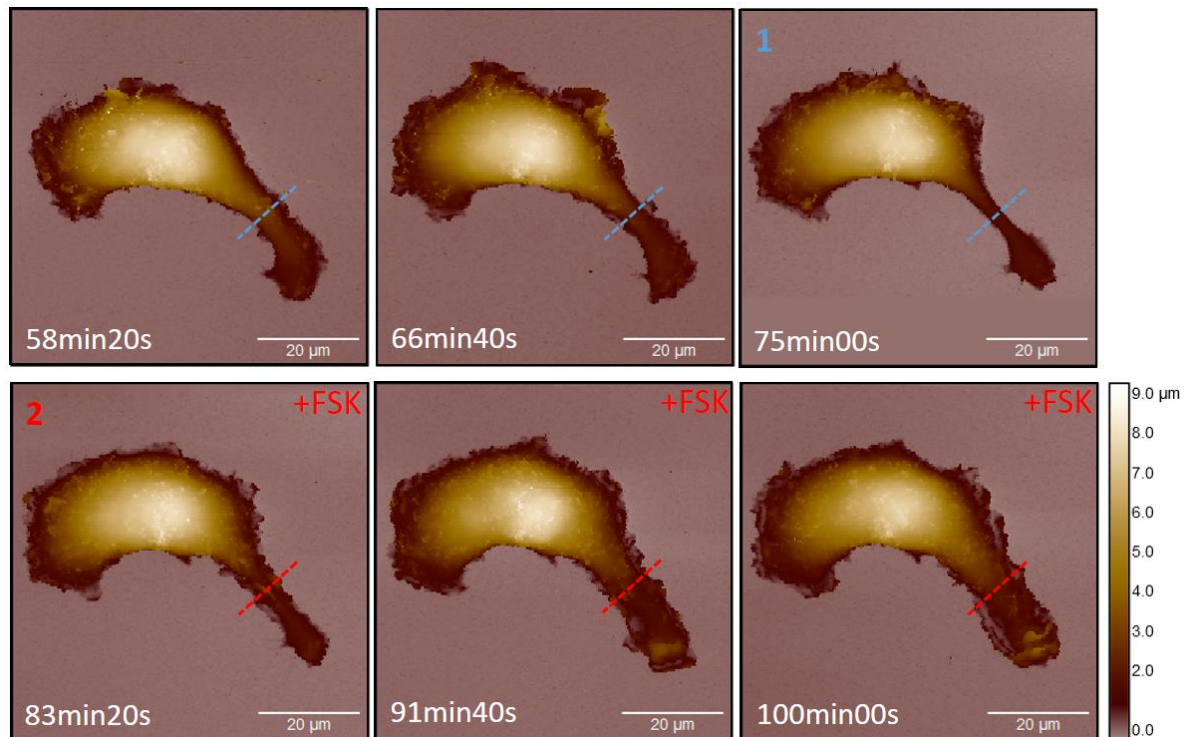

**Figure S16.** Topography profiles of dendrites outgrowth on a melanoma cell after the indicated duration of FSK treatment. Height profile of the dendrite (Figure 4e) over a time sequence. 1 shows a cell dendrite before treatment and 2 after adding 20  $\mu\text{M}$  FSK.

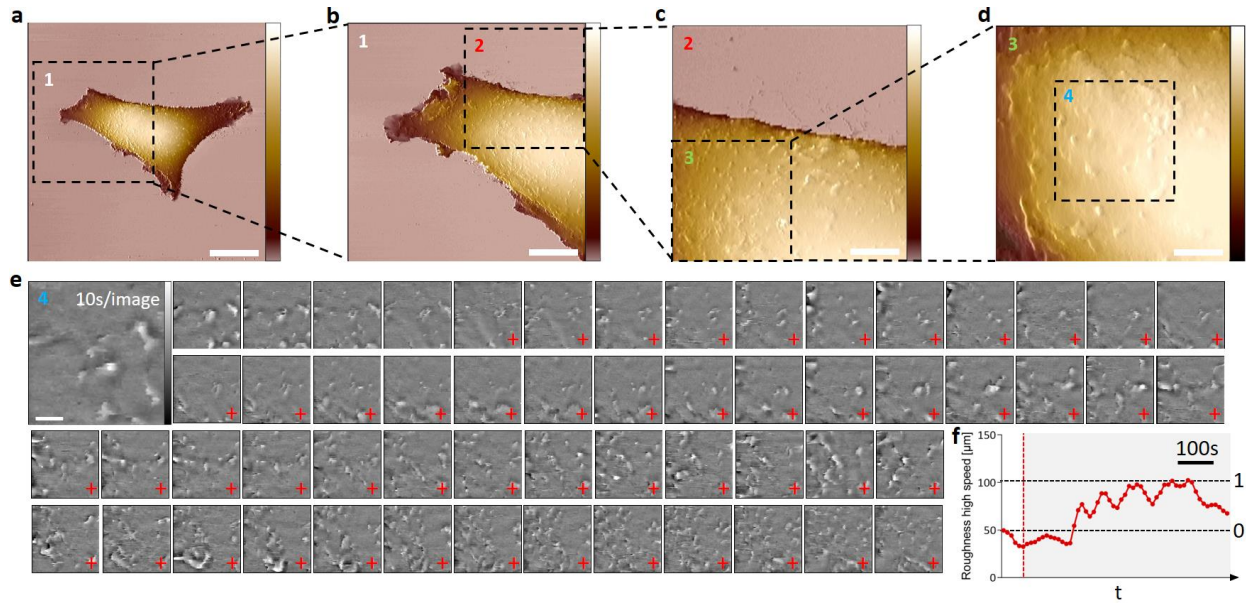

**Figure S17.** Real-time effect of FSK on a melanoma cell membrane with fast SICM image acquisition. (a) Topography image of a melanoma cell on an area of 100  $\mu\text{m}$ . Acquired at 125 Hz hopping rate and 5  $\mu\text{m}$  hopping height,  $512 \times 256$  pixels. Scale bar, 20  $\mu\text{m}$ . Z scale, 0-11  $\mu\text{m}$ . (b) Topography image of area 1 marked in a. acquired at 200 Hz hopping rate and 3  $\mu\text{m}$  hopping height,  $512 \times 256$  pixels. Scale bar, 10  $\mu\text{m}$ . Z scale, 0-9  $\mu\text{m}$ . (c) Topography image of area 2 marked in b. acquired at 285 Hz hopping rate and 2  $\mu\text{m}$  hopping height,  $256 \times 128$  pixels. Scale bar, 5  $\mu\text{m}$ . Z scale, 0-8  $\mu\text{m}$ . (d) Topography image of area 3 marked in c. acquired at 500 Hz hopping rate and 1  $\mu\text{m}$  hopping height,  $256 \times 128$  pixels. Scale bar, 2.5  $\mu\text{m}$ . Z scale, 0-6  $\mu\text{m}$ . (e) Real-time effect of FSK (+) on the melanoma cell membrane of area 4 marked in d at 10 s/image from a sequence of images acquired at 1 kHz hopping rate and 500 nm hopping height,  $100 \times 100$  pixels. Scale bar, 1  $\mu\text{m}$ . Z scale, -300 to +300 nm. For better visualization and quantification, images were flattened and fixed to median zero, followed by a 2-pixel conservative denoise filter. (f) Plot of the surface roughness as a measure to quantify protrusion activity on the cell membrane over time after adding 20  $\mu\text{M}$  FSK (red dashed line). (0) Max roughness before FSK treatment at the beginning as a baseline. (1) Maximal roughness level after FSK treatment. Roughness is defined as the root mean square of height irregularities computed from 2nd central moment of data values.

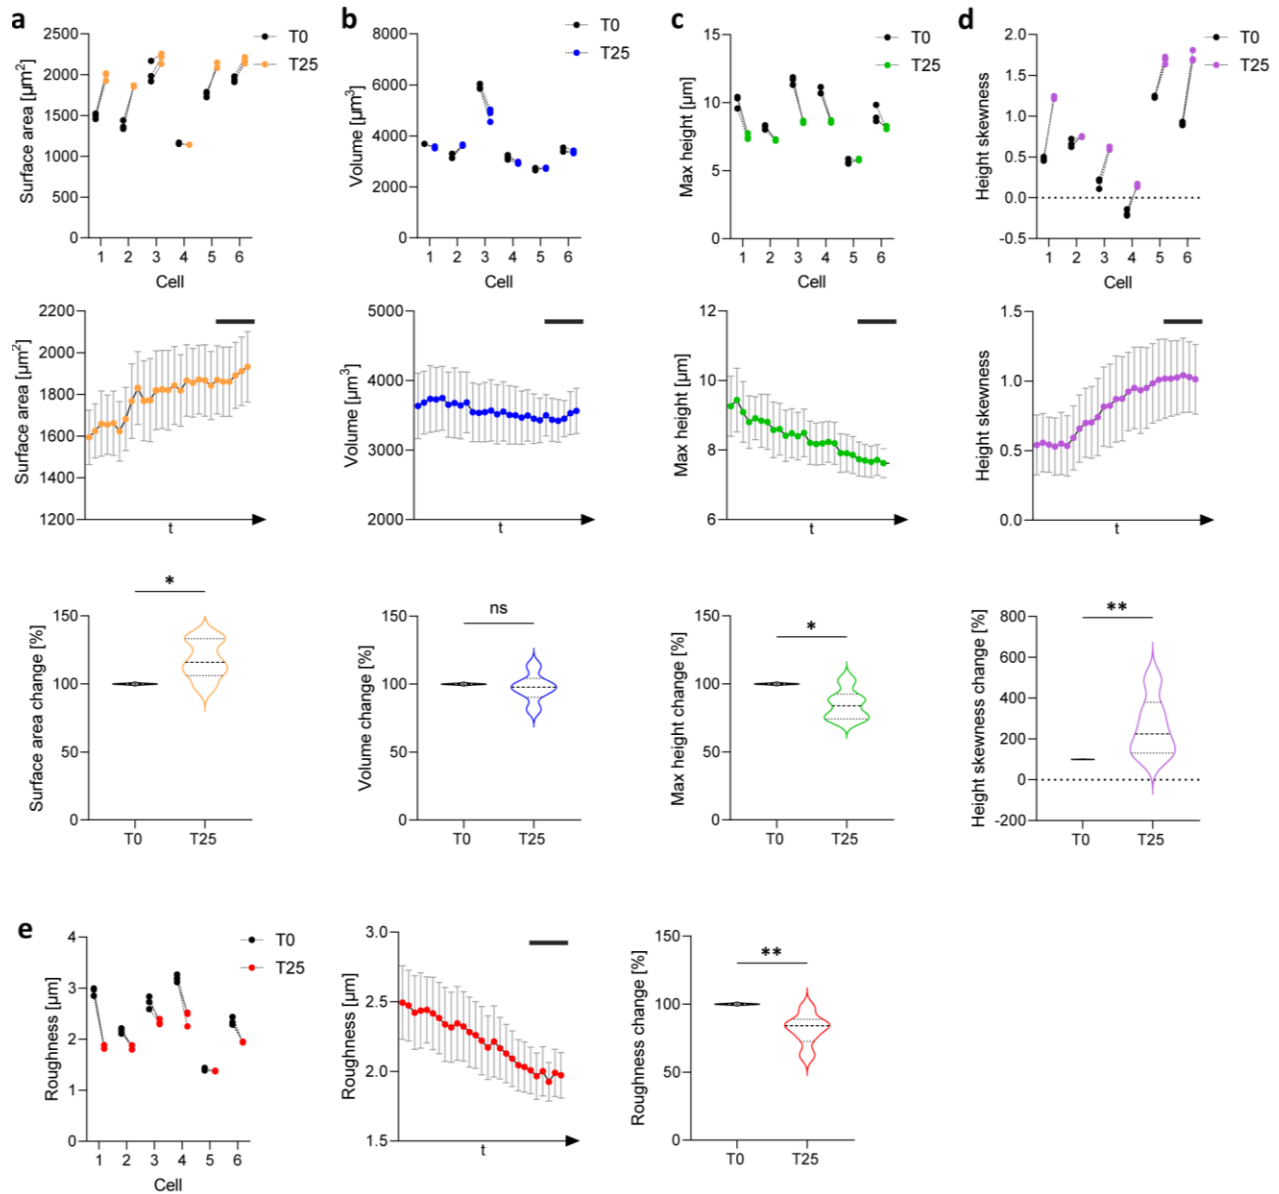

**Figure S18.** Tracking morphological changes on melanoma cells treated with FSK with time-resolved SICM. (a) Change in surface area; (b) volume change; (c) max height change; (d) height skewness change; and (e) roughness change. Each parameter was measured in 6 different cells. The first graph represents the measured value in the first three frames of scanning (T0), related to the values measured at frames 25-27 of the same cell (T25). The graph below shows the change in the measurement over time. Violin plots represent the percentage of the parameter change at T25 relative to T0. Error bars represent SEM,  $n=6$ . \* $P < 0.05$ , \*\* $P < 0.01$ . Data were compared using the two-tailed Mann-Whitney test. Scale bar 50 minutes. The surface area is computed by

triangulation of neighboring pixels and the volume is calculated as the integral of the surface height over the covered area. Height skewness is computed from the third central moment of data values.



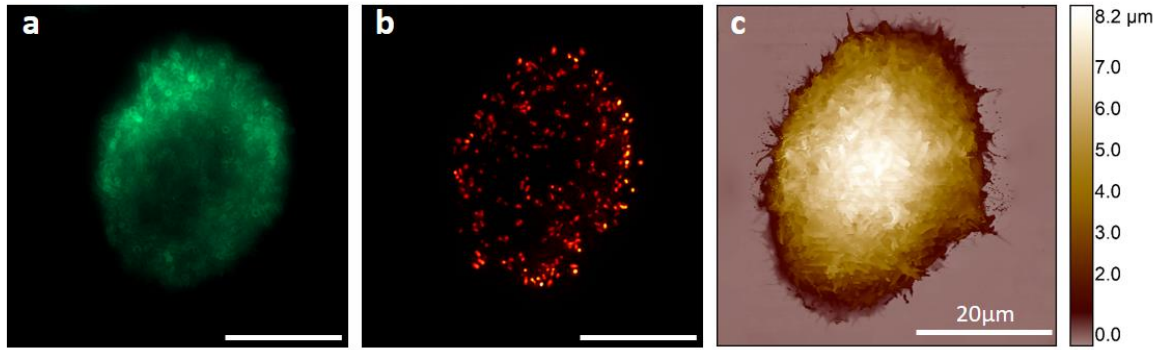

**Figure S19.** Fluorescence image of the bacterium affinity (*E. coli*) to the host mammalian cell membrane (HeLa), correlated with SICM topography. (a) cd80 based GFP display in HeLa cells for direct visualization of the ligand (GFP) sequestered by VHH-intimin expressed by *E. coli* K12. Scale bar, 20  $\mu\text{m}$ . (b) Visualization of *E. coli* K12 expressing mScarlet in the cytosol. Scale bar, 20  $\mu\text{m}$ . (c) Three-dimensional representation of the live cell membrane surface with SICM. Acquired at 125 Hz hopping rate and 5  $\mu\text{m}$  hopping height, 512  $\times$  512 pixels.

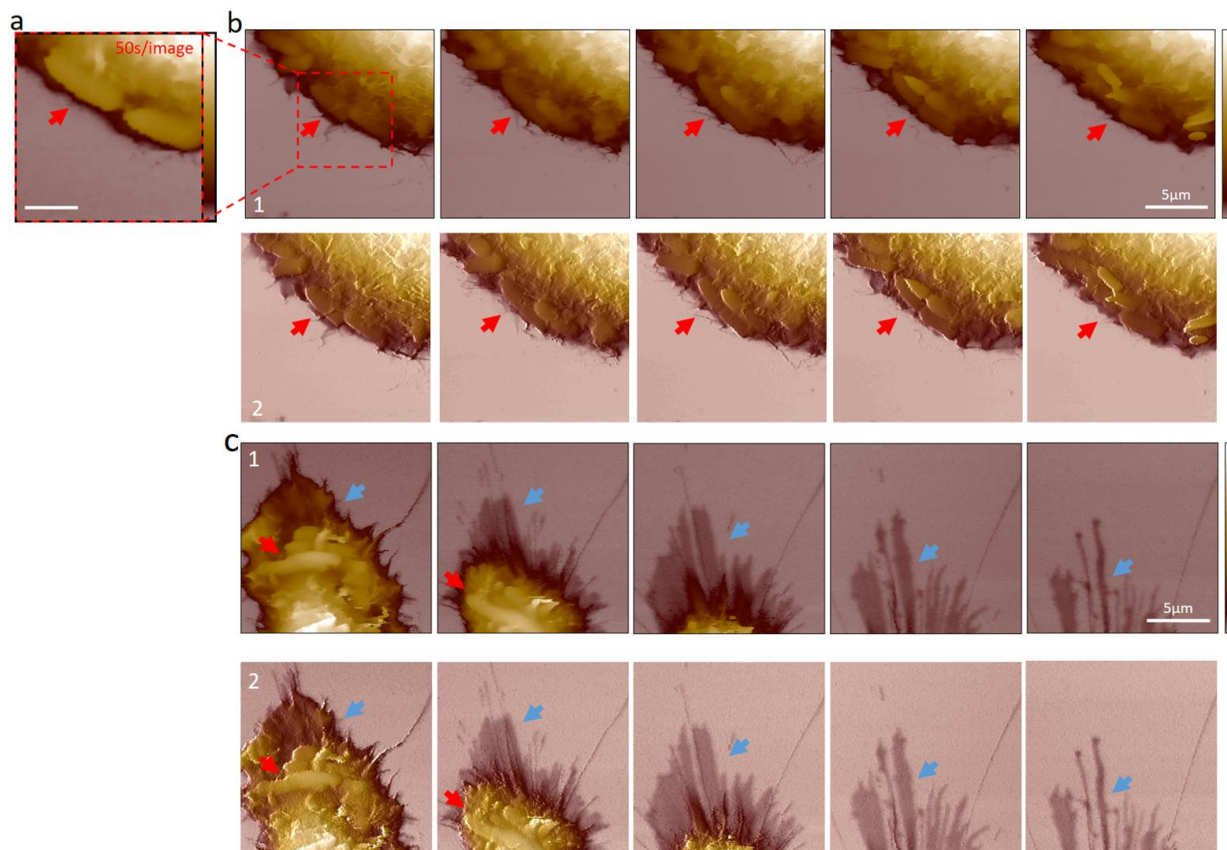

**Figure S20.** Time-resolved SICM shows a HeLa cell being infected by *E. coli* bacteria. (a) Topography image resolving *E. coli* dividing on the host HeLa cell membrane on a small area of 7.5  $\mu\text{m}$ . Acquired at 250 Hz hopping rate and 2  $\mu\text{m}$  hopping height,  $100 \times 100$  pixels. Scale bar, 2  $\mu\text{m}$ . Z scale, 0–3.2  $\mu\text{m}$ . (b) Topography of *E. coli* on a 15  $\mu\text{m}$  area adhering and proliferating on the host cell membrane periphery (1). Red arrows point to the bacteria dividing on the membrane. Acquired at 125 Hz hopping rate and 4  $\mu\text{m}$  hopping height,  $256 \times 256$  pixels. Scale bar, 5  $\mu\text{m}$ . Z scale, 0–6  $\mu\text{m}$ . (c) Topography of *E. coli* adhered on the host cell membrane dendrite (1). Red arrows point to bacteria on the membrane and blue arrows point to the dendrite retracting. Acquired at 125 Hz hopping rate and 4  $\mu\text{m}$  hopping height,  $256 \times 256$  pixels. For better visualization, the topography channel was merged with the slope channel to enhance the surface edges (2). Scale bar, 5  $\mu\text{m}$ . Z scale, 0–3  $\mu\text{m}$ .

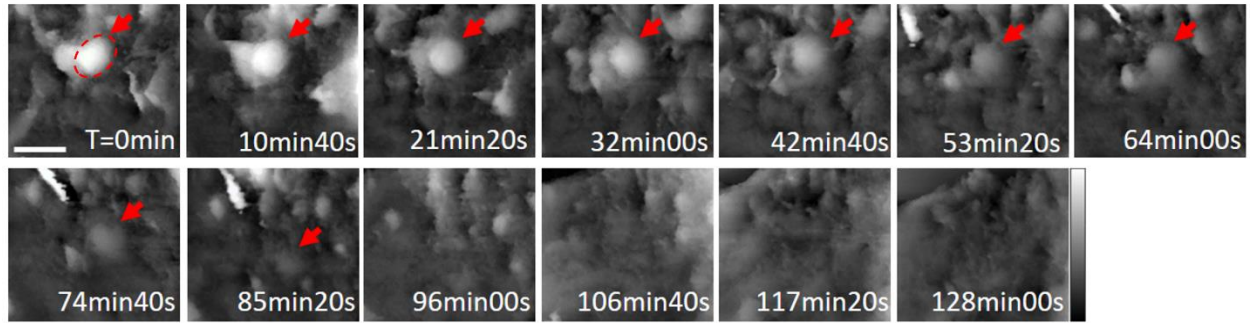

**Figure S21.** Time-resolved SICM shows *E. coli* being internalized by HeLa cell membrane over time. Arrows point to a bacterium being internalized over 85 minutes. Zoom-in cut on an area from the long time-lapse shown in Figure 5e. Acquired at 125 Hz hopping rate and 4  $\mu\text{m}$  hopping height,  $256 \times 256$  pixels. For better visualization, the membrane surface was flattened. Scale bar, 2  $\mu\text{m}$ . Z scale, 0-1.1  $\mu\text{m}$ .

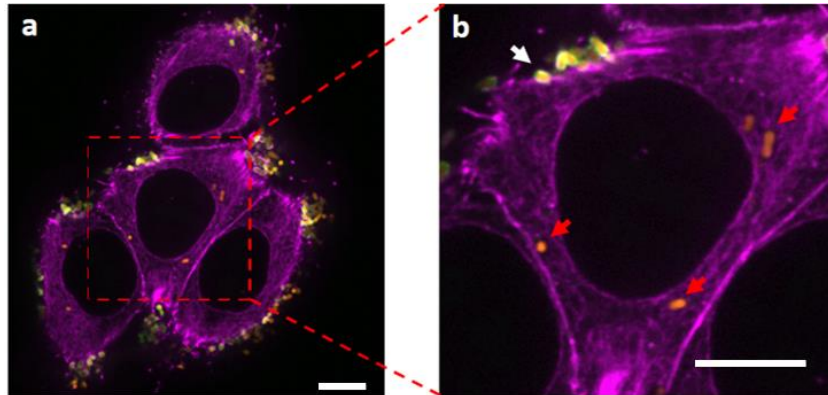

**Figure S22.** Fluorescence image of *E. coli* internalized by HeLa cell membrane. (a) Infected cell showing bacteria adhered on the membrane and locally accumulating GFP signal (cd80 based GFP display). Cells were fixed in 4% paraformaldehyde for 20 minutes, permeabilized with 0.1% Triton X-100 for 5 minutes, and washed twice with PBS. Phalloidin-Atto 655 (Sigma) was used to stain actin at 500 nM for 15 minutes (purple). Data collected with a spinning disk confocal microscope and 100x oil immersion objective. Scale bar, 10  $\mu\text{m}$ . (b) Zoom in on an area showing bacteria that were internalized and lost the GFP signal (red arrows), potentially due to lysosomal pH. The white arrow shows bacteria that were not internalized and kept the GFP signal. Scale bar, 10  $\mu\text{m}$ .

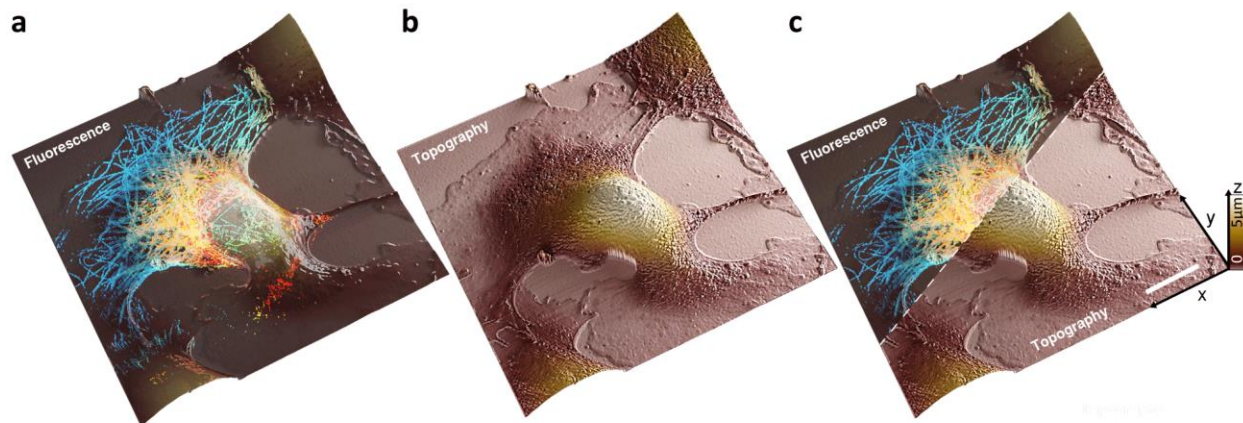

**Figure S23.** Correlative fluorescence and scanning ion conductance microscopy. (a) Fluorescence image of microtubules. (b) SICM topography image of the cell membrane. (c) Correlative fluorescence/topography image of a mammalian cell (COS7). Scale bar, 10  $\mu\text{m}$ .

## References

- (1) Kammer, C.; Nievergelt, A. P.; Fantner, G. E.; Karimi, A. Data-Driven Controller Design for Atomic-Force Microscopy. *IFAC-PapersOnLine* **2017**, *50* (1), 10437–10442.
- (2) Jung, G.-E.; Noh, H.; Shin, Y. K.; Kahng, S.-J.; Baik, K. Y.; Kim, H.-B.; Cho, N.-J.; Cho, S.-J. Nanoscale Closed-Loop ARS Mode for Scanning Ion Conductance Microscopy with Improved Speed and Stability for Live Cell Imaging Applications Closed-Loop ARS Mode for Scanning Ion Conductance Microscopy with Improved Speed and Stability for Live Cell Imaging Applications. *Nanoscale*. **2015**, *7* (7), 10835-11228.
- (3) Nievergelt, A. P.; Andany, S. H.; Adams, J. D.; Hannebelle, M. T.; Fantner, G. E. Components for High-Speed Atomic Force Microscopy Optimized for Low Phase-Lag. *2017 IEEE International Conference on Advanced Intelligent Mechatronics (AIM)*, Munich, Germany, 3-7 July **2017**; Publisher: IEEE, 2017, 17136696, 731–736.
- (4) Djekic, D.; Ortmanns, M.; Fantner, G.; Anders, J. A Tunable, Robust Pseudo-Resistor with Enhanced Linearity for Scanning Ion-Conductance Microscopy. *2016 IEEE International Symposium on Circuits and Systems (ISCAS)*, Montreal, Canada, 22-25 May **2016**; Publisher: IEEE, 2016, 842–845.
- (5) Djekic, D.; Fantner, G.; Lips, K.; Ortmanns, M.; Anders, J. A 0.1% THD, 1-M $\Omega$  to 1-G $\Omega$  Tunable, Temperature-Compensated Transimpedance Amplifier Using a Multi-Element Pseudo-Resistor. *IEEE J. Solid-State Circuits* **2018**, *53* (7), 1913–1923.
- (6) Djekic, D.; Fantner, G.; Behrends, J.; Lips, K.; Ortmanns, M.; Anders, J. A Transimpedance Amplifier Using a Widely Tunable PVT-Independent Pseudo-Resistor for High-Performance Current Sensing Applications. *ESSCIRC 2017 - 43rd IEEE European Solid State Circuits Conference*, Leuven, Belgium, 11-14 Sept. **2017**; Publisher: IEEE, 2017, 79–82.
